# Supplementary material for: Diverse Profile of Fermentation Byproducts From Thin Stillage
Source: Frontiers journal article supplement (doi:10.3389/fbioe.2021.695306), 2021-07-15
Supplement: Data_Sheet_1.pdf [file Data_Sheet_1.pdf]

## **Diverse profile of fermentation byproducts from thin stillage**

Nathaniel W. Fortney<sup>1</sup>, Nathaniel J. Hanson<sup>1,2</sup>, Paula R. F. Rosa<sup>1,3</sup>, Timothy J. Donohue<sup>1,4</sup>,  
Daniel R. Noguera<sup>1,5\*</sup>

<sup>1</sup> Great Lakes Bioenergy Research Center, University of Wisconsin-Madison, Madison, WI, USA

<sup>2</sup> Wisconsin Youth Apprenticeship Program, Department of Workforce Development, Madison, WI, USA

<sup>3</sup> Department of Chemical Engineering, Federal University of São Carlos, São Carlos, SP, Brazil

<sup>4</sup> Department of Bacteriology, University of Wisconsin-Madison, Madison, WI, USA

<sup>5</sup> Department of Civil and Environmental Engineering, University of Wisconsin-Madison, Madison, WI, USA

\*Corresponding author: Daniel R. Noguera, [noguera@engr.wisc.edu](mailto:noguera@engr.wisc.edu), 608-263-7783.

## **SUPPLEMENTAL RESULTS**

### **Detailed community analysis**

In the R1<sub>TS</sub> experiment, two highly abundant *Prevotella* 7-related OTUs, (AB818575.1.1466 and EU887831.1.1496) accounted for 27.7±13.4% and 9.6±5.4% of the 16S rRNA gene sequence reads per sample, respectively. *Prevotella* are common rumen inhabitants and have been shown to produce C<sub>4</sub> from LA and carbohydrates (Esquivel-

Elizondo et al., 2017; Fraga et al., 2018). *Pediococcus* (MF436194.1.1509) was the most prominent *Lactobacillaceae* in the R1<sub>TS</sub> bioreactor at 13.3±7.0% relative abundance, whereas the abundance of other genera of this family was much lower. Like other heterofermentative *Lactobacillaceae*, pediococci produce LA and C2 from carbohydrates (Dicks & Endo, 2014; Zheng et al., 2020). Two *Lachnospiraceae* OTUs, *Acetitomaculum* (GU303559.1.1495) and *Lachnospiraceae* NK3A20 group (AB746782.1.1535), were present at approximately 3-4% relative abundance. *Acetitomaculum* are another typical rumen inhabitant noted for C2 production from carbohydrates (Greening & Leedle, 1989; Li et al., 2012; Rainey, 2011). Unique to the abundant OTUs in R1<sub>TS</sub> was an OTU related to *Dialister* (New.ReferenceOTU88), a genus of Clostridia which is noted for the ability to metabolize succinate and produce C3 (Morotomi et al., 2008; Wade, 2011), present at 2.7±2.4% relative abundance. Conversely, an *Acetobacter*-related OTU (FJ157231.1.1401), present at 3.6±2.1% in the R1<sub>TS</sub> community, was also present as an abundant microbial community member in all five bioreactors (Fig. 3). *Acetobacter* are common in fermented foods, but have also been observed in other mixed culture fermentations (Andersen et al., 2017). They are typically noted for the ability to produce C2 from carbohydrates and other carbon sources including glycerol, and subsequent mineralization of C2 (Cleenwerck et al., 2008; Cleenwerck et al., 2002; Komagata et al., 2014).

Shifts in the microbial community occurred when the solids were removed from TS in the R2<sub>SR-TS</sub> experiment, including the selection of an OTU related to *Furfurilactobacillus* (AJ564009.1.1368), a heterolactic fermenter, at 18.9±4.7% relative abundance (Fig. 3). A second lactobacillus that was enriched to a lower abundance (6.4±2.5% relative abundance) in the R2<sub>SR-TS</sub> reactor was related to *Lacticaseibacillus* (JN561696.1.1371), a

homolactic fermenter. Both lactobacilli have been isolated from diverse substrates such as cereal grain fermentations and corn liquor (Zheng et al., 2020). The *Lachnospiraceae* NK3A20 group (AB746782.1.1535) OTU that was present in R1<sub>TS</sub> was also abundant in R2<sub>SR-TS</sub>, at  $10.6 \pm 4.2\%$  abundance. Additional *Clostridia* including OTUs related to *Pseudoramibacter* (AB036759.1.1480), which are known or predicted to produce MCFA from carbohydrates (Holdeman et al., 1967), glycerol and LA (Scarborough et al., 2020), and related to the [*Eubacterium*] *nodatum* group (GQ458236.1.1465) were abundant under the R2<sub>SR-TS</sub> reactor conditions at  $8.4 \pm 8.1\%$  and  $3.1 \pm 3.1\%$ , respectively. Two *Prevotella* 7 OTUs (EU887831.1.1496 and AB818575.1.1466), initially observed in R1<sub>TS</sub>, decreased in relative abundance, to  $3.7 \pm 1.5\%$  and  $11.8 \pm 5.2\%$ , respectively.

Decreasing the SRT to 1 day in R3<sub>LowSRT</sub> resulted in the washout of the *Lachnospiraceae*-related OTUs, but other OTUs from the *Clostridia* remained abundant in the microbial community, such as *Pseudoramibacter* (AB036759.1.1480) and [*Eubacterium*] *nodatum* group (GQ458236.1.1465) at  $8.7 \pm 4.5\%$  and  $1.8 \pm 1.3\%$  relative abundance, respectively (Fig. 3). Additionally, *Pediococcus* (MF436194.1.1509) remained a prominent OTU in the microbial community at  $12.4 \pm 5.1\%$  relative abundance.

*Companilactobacillus* species are a frequent presence in food fermenting communities (Zheng et al., 2020), and the two related OTUs (AJ496791.1.1570 and AJ417738.1.1567) from R3<sub>LowSRT</sub> maintained a consistent low-level abundance at  $1.2 \pm 0.7\%$  and  $2.0 \pm 1.2\%$ , respectively. Conversely, *Furfurilactobacillus* (AJ564009.1.1368) was the most abundant lactobacillus in the community, at  $22.5 \pm 4.7\%$ . The *Prevotella* 7 OTUs further decreased in abundance to ca. 10% (AB818575.1.1466) and 3% (EU887831.1.1496).

Operating the bioreactor at thermophilic temperatures (55 °C) had a pronounced effect on the composition of the microbial community in R4<sub>T-pH</sub>. *Prevotella* OTUs were absent from the abundant members of the microbial community and *Clostridiales* OTUs were reduced in relative abundance as compared to the reactors operating at mesophilic temperatures (Fig. 3). Instead, *Acetobacter* OTUs accounted for approximately 35% of the reads in R4<sub>T-pH</sub>, and a single OTU (AJ419838.1.1440) dominated at 29.7±6.0% relative abundance. The second most abundant OTU corresponded to *Furfurilactobacillus*, while other lactobacilli were present at lower abundances. In addition, a *Bacillus* OTU (KP297896.1.1456) was enriched in R4<sub>T-pH</sub>, with 6.8±1.5% relative abundance.

The R5<sub>T-pH-LowSRT</sub> microbial community had only 11, the fewest number of, OTUs greater than 1% relative abundance among all the bioreactors. In general, the prominent OTUs in the R5<sub>T-pH-LowSRT</sub> bioreactor were similar to those observed in R4<sub>T-pH</sub>, corresponding to a microbial community dominated by *Acetobacter* (AJ419838.1.1440, 28.7±6.1%) with a few lesser abundant *Lactobacillaceae*-related OTUs (Fig. 3). Two additional *Lactobacillaceae* OTUs, *Lactiplantibacillus* (JN043518.1.1483) at 11.5±5.1% relative abundance, and *Levilactobacillus* (JF763842.1.1470), a lactobacillus associated with beer-spoilage (Zheng et al., 2020), was present at 4.8±3.9%.

## **SUPPLEMENTAL FIGURES**

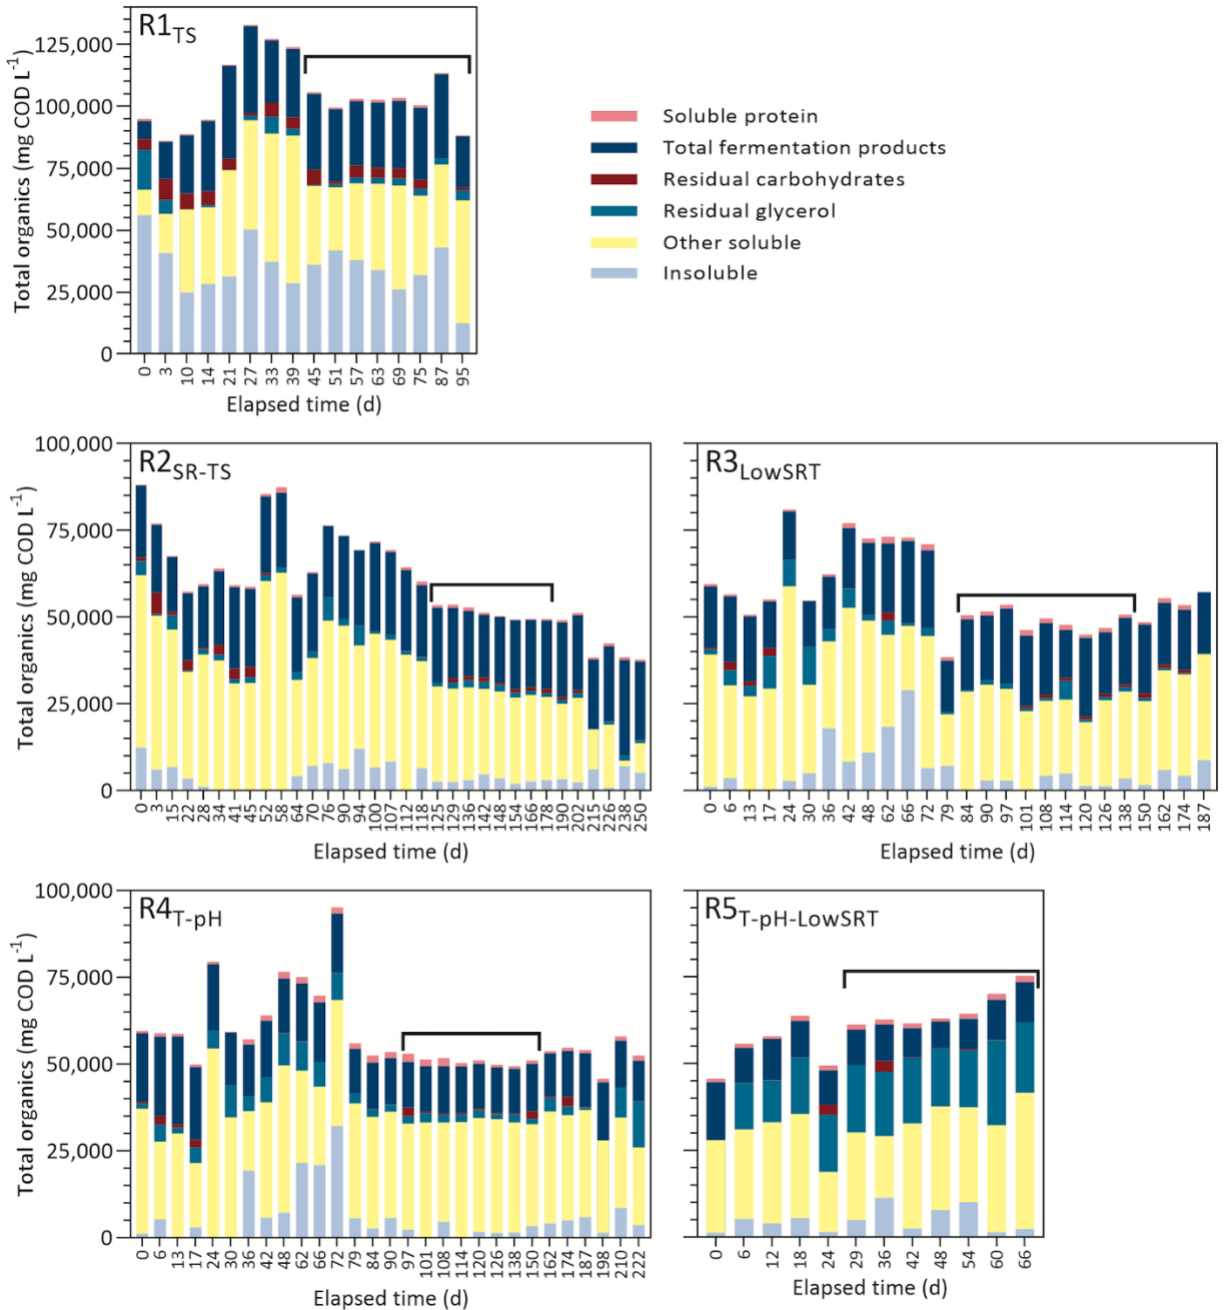

**Figure S1.** Dynamics of bioreactors ran under different operating conditions. R3<sub>LowSRT</sub> operated at a 1 d SRT starting at 48 d. R4<sub>T-pH</sub> was operated at 55°C starting at 24 d, pH was reduced to 4.5 by 54 d, and increased to 5.0 by 120 d. R5<sub>T-pH-LowSRT</sub> was initially at thermophilic temperatures and operated at a 1 d SRT at 19 d. Insoluble portion of the total organics represents the difference between total and soluble COD of the effluent and can be

inferred to be accumulated microbial biomass, with the exception of R1<sub>TS</sub> which also contains influent-derived solids. Other soluble COD represents the remaining measured COD that was uncharacterized by other analytical methods plus metabolites detected at trace concentrations. Total carbohydrates are the sum of unconsumed glucose, xylose, and cellobiose remaining in the effluent. Total fermentation products represent the sum of all carboxylic acids and ethanol. Brackets mark a window of approximately 50 d during which bioreactor operation was more stable following the initial dynamic phase.

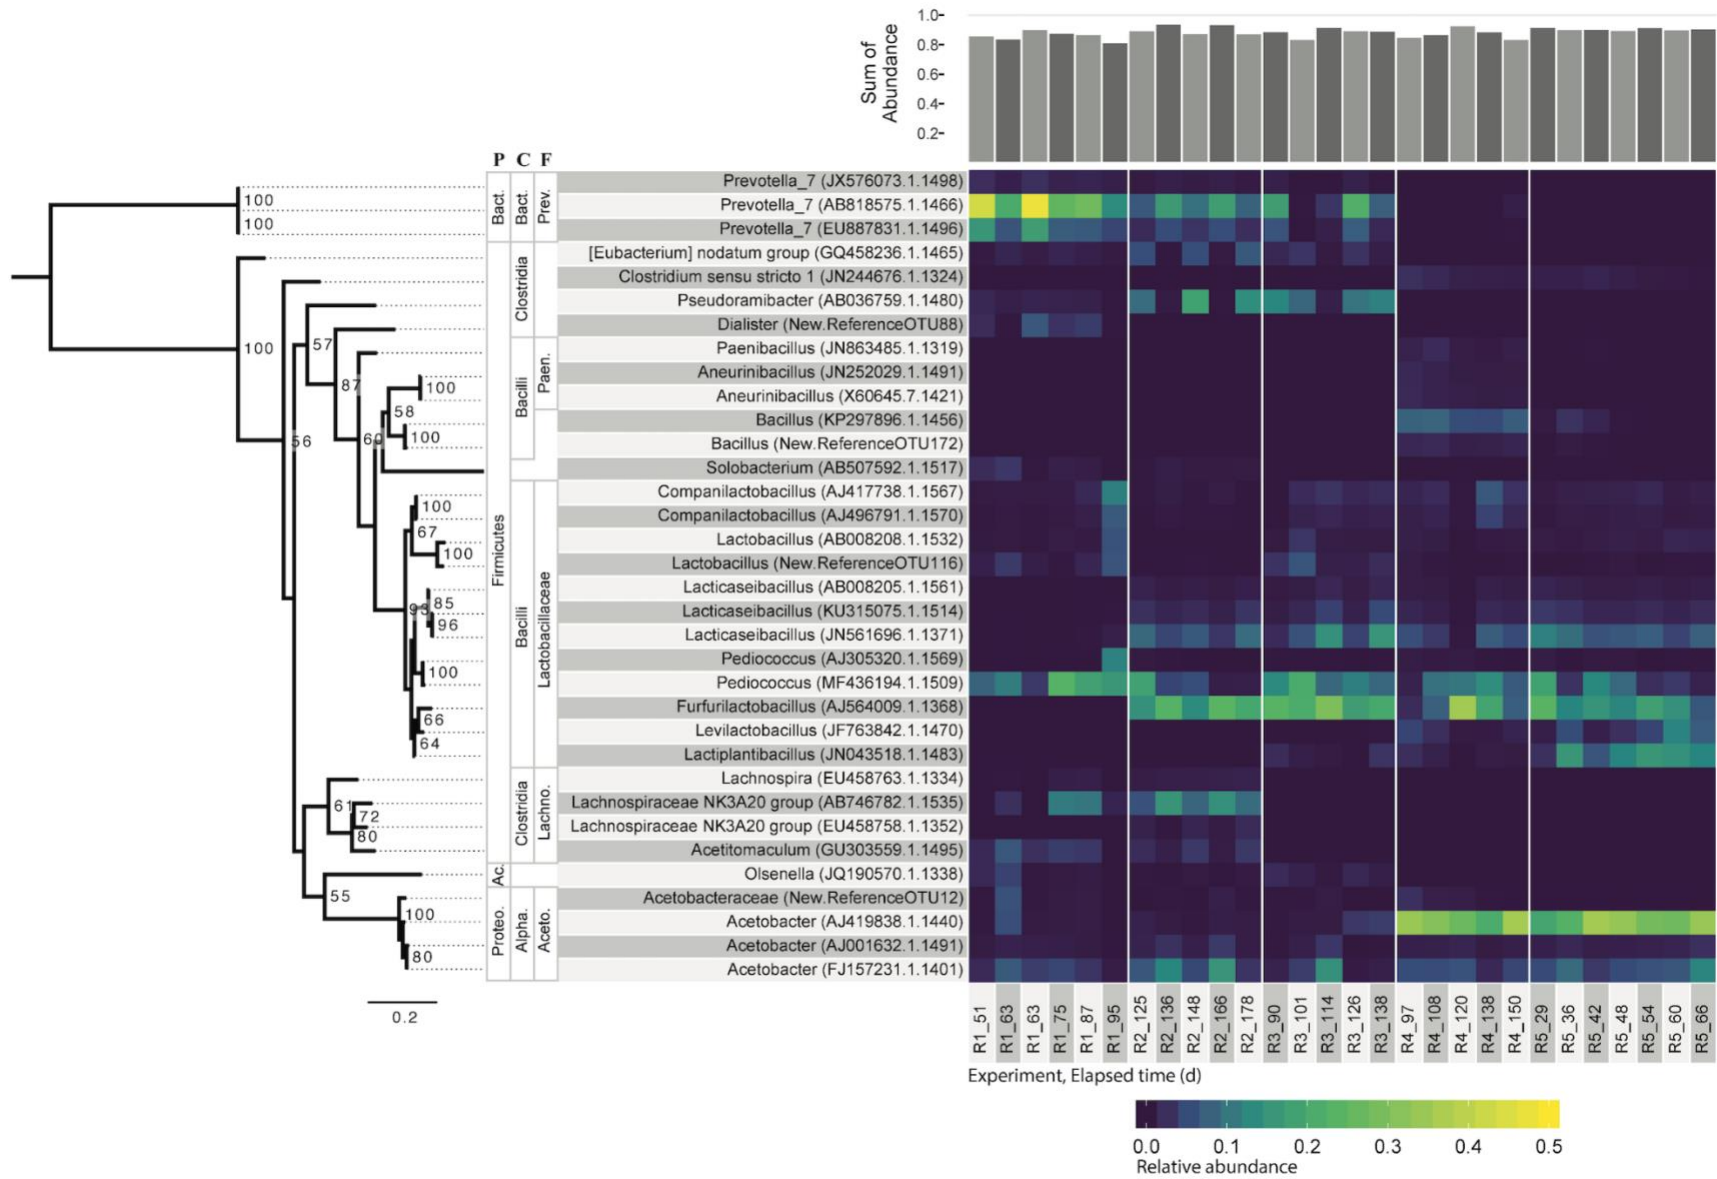





**Figure S3.** Fermentation product formation rate in R3<sub>LowSRT</sub> from a 6 d SRT to a 1 d SRT, averaged across three samples per time period. The production rate during the 1 d SRT phase was averaged across all samples at this retention time ( $n=18$ ), the first half of the 1 d SRT phase ( $n=9$ ), and last half of 1 d SRT operation ( $n=9$ ).

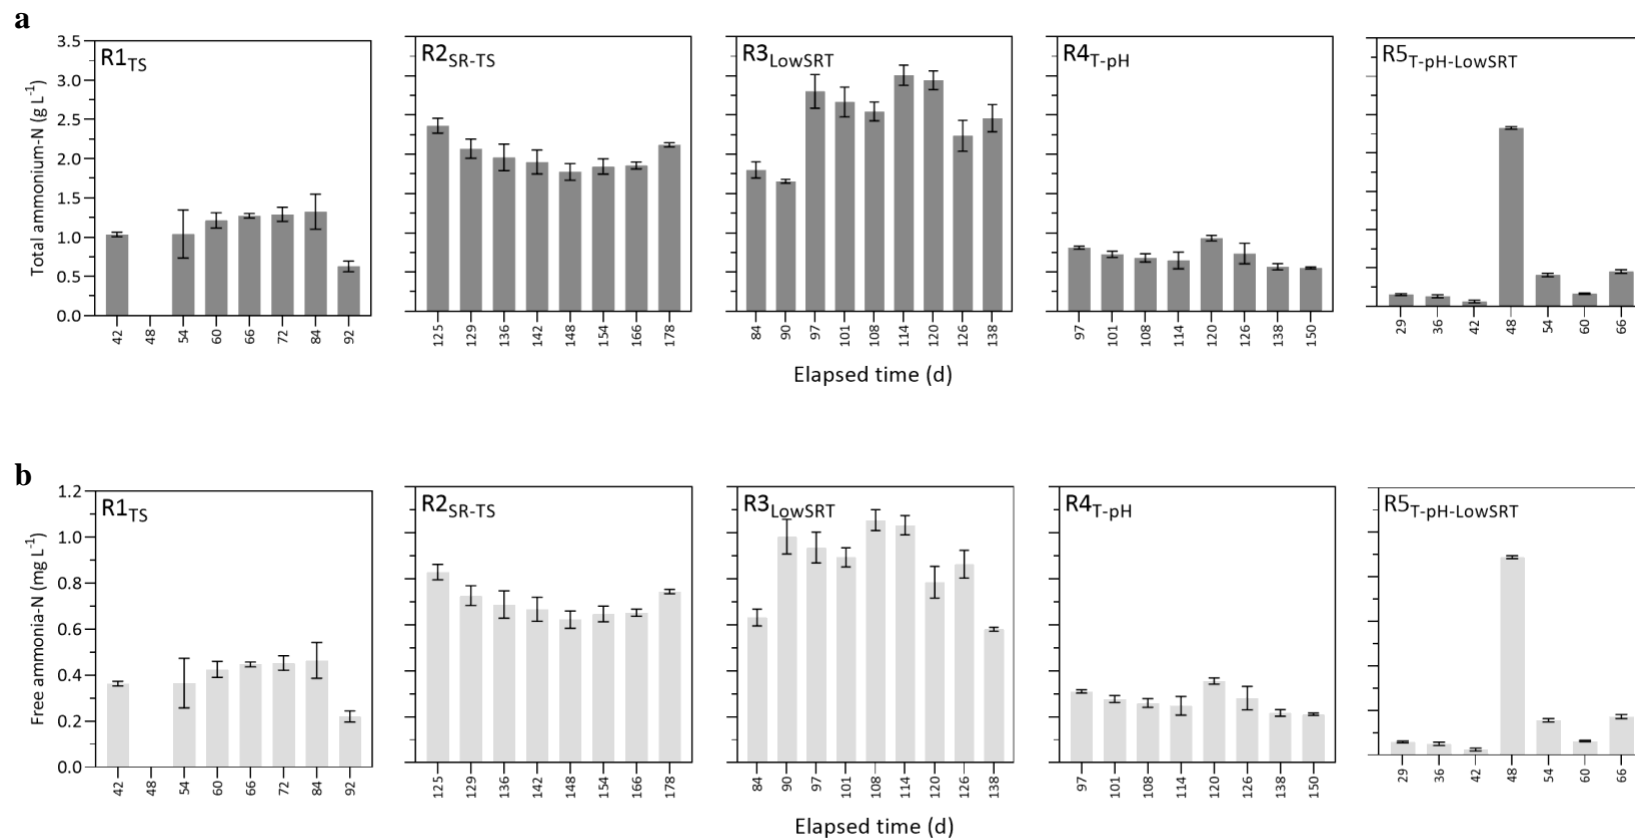

**Figure S4.** Total ammonium nitrogen (TAN) concentration (a; sum of  $\text{NH}_4^+\text{-N}$  and  $\text{NH}_3\text{-N}$ ), and free ammonia nitrogen (FAN) concentration (b; ideal equilibrium calculation) during indicated periods of reactor stability. Note the difference in units between the two figures.

## SUPPLEMENTAL REFERENCES

- Andersen, S.J., De Groof, V., Khor, W.C., Roume, H., Props, R., Coma, M., Rabaey, K. 2017. A Clostridium Group IV Species Dominates and Suppresses a Mixed Culture Fermentation by Tolerance to Medium Chain Fatty Acids Products. *Frontiers in Bioengineering and Biotechnology*, **5**, 8189-10.
- Cleenwerck, I., Gonzalez, Á., Camu, N., Engelbeen, K., De Vos, P., De Vuyst, L. 2008. *Acetobacter fabarum* sp. nov., an acetic acid bacterium from a Ghanaian cocoa bean heap fermentation. *International Journal of Systematic and Evolutionary Microbiology*, **58**(Pt 9), 2180-2185.
- Cleenwerck, I., Vandemeule, K., Janssens, D., Swings, J. 2002. Re-examination of the genus *Acetobacter*, with descriptions of *Acetobacter cerevisiae* sp. nov. and *Acetobacter malorum* sp. nov. *International Journal of Systematic and Evolutionary Microbiology*, **52**(5), 1551-1558.
- Dicks, L., Endo, A. 2014. The Family *Lactobacillaceae*: Genera Other than *Lactobacillus*. in: *The Prokaryotes*, (Eds.) E. Rosenberg, E.F. DeLong, S. Lory, E. Stackebrandt, F. Thompson, Springer-Verlag. Berlin Heidelberg, pp. 203-212.
- Esquivel-Elizondo, S., Ilhan, Z.E., Garcia-Peña, E.I., Krajmalnik-Brown, R. 2017. Insights into Butyrate Production in a Controlled Fermentation System via Gene Predictions. *mSystems*, **2**(4), 201-13.
- Fraga, M., Fernández, S., Perelmutter, K., Pomiés, N., Cajarville, C., Zunino, P. 2018. The use of *Prevotella bryantii* 3C5 for modulation of the ruminal environment in an ovine model. *Brazilian Journal of Microbiology*, **49**(Supplement 1), 101-106.
- Greening, R.C., Leedle, J.A.Z. 1989. Enrichment and isolation of *Acetitomaculum ruminis*, gen. nov., sp. nov.: acetogenic bacteria from the bovine rumen. *Archives of Microbiology*, **151**, 399-406.
- Holdeman, L.V., Cato, E.P., Moore, W.E.C. 1967. Amended Description of *Ramibacterium alactolyticum* Prévot and Taffanel with Proposal of a Neotype Strain. *International Journal of Systematic Bacteriology*, **17**(4), 323-341.
- Komagata, K., Iino, T., Yamada, Y. 2014. The Family *Acetobacteraceae*. 4 ed. in: *The Prokaryotes - Alphaproteobacteria and Betaproteobacteria*, (Eds.) E. Rosenberg, E.F. DeLong, S. Lory, E. Stackebrandt, F. Thompson, Vol. 2, Springer-Verlag. Berlin Heidelberg, pp. 3-78.
- Li, M., Zhou, M., Adamowicz, E., Basarab, J.A., Guan, L.L. 2012. Characterization of bovine ruminal epithelial bacterial communities using 16S rRNA sequencing, PCR-DGGE, and qRT-PCR analysis. *Veterinary Microbiology*, **155**(1), 72-80.
- Morotomi, M., Nagai, F., Sakon, H., Tanaka, R. 2008. *Dialister succinatiphilus* sp. nov. and *Barnesiella intestinihominis* sp. nov., isolated from human faeces. *International Journal of Systematic and Evolutionary Microbiology*, **58**(Pt 12), 2716-2720.
- Rainey, F.A. 2011. Family V. Lachnospiraceae fam. nov. in: *Bergey's Manual of Systematic Bacteriology*, (Eds.) P. De Vos, G.M. Garrity, D. Jones, N.R. Krieg, W. Ludwig, F.A. Rainey, K.-H. Schleifer, W.B. Whitman, Vol. 3, Springer Science & Business Media. New York, NY, pp. 921-968.
- Scarborough, M.J., Myers, K.S., Donohue, T.J., Noguera, D.R. 2020. Medium-Chain Fatty Acid Synthesis by "*Candidatus Weimeria bifida*" gen. nov., sp. nov., and "*Candidatus Pseudoramibacter fermentans*" sp. nov. *Applied and Environmental Microbiology*, **86**(3), 2796.

- Wade, W.G. 2011. Genus XII. Dialister. 2 ed. in: *Bergey's Manual of Systematic Bacteriology*, Vol. 3: *The Firmicutes*, (Eds.) P. Vos, G. Garrity, D. Jones, W. Ludwig, F.A. Rainey, K.-H. Schleifer, W.B. Whitman, Vol. 3, Springer. New York, pp. 1080-1082.
- Zheng, J., Wittouck, S., Salvetti, E., Franz, C.M.A.P., Harris, H.M.B., Mattarelli, P., O'Toole, P.W., Pot, B., Vandamme, P., Walter, J., Watanabe, K., Wuyts, S., Felis, G.E., Gänzle, M.G., Lebeer, S. 2020. A taxonomic note on the genus *Lactobacillus*: Description of 23 novel genera, emended description of the genus *Lactobacillus* beijerinck 1901, and union of Lactobacillaceae and Leuconostocaceae. *International Journal of Systematic and Evolutionary Microbiology*, **70**(4), 2782-2858.
